# Supplementary material
Source: PubMed Central journal article supplement (PMC7502475)

# Supplementary Figure 2

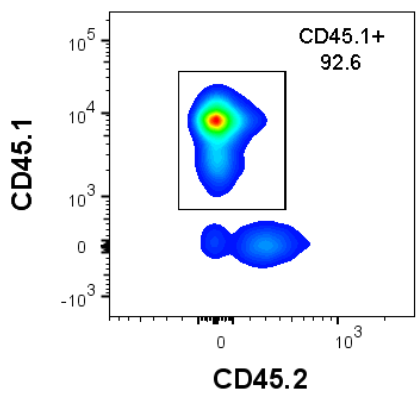

Supplement: NIHMS1596774-supplement-3.pdf [file NIHMS1596774-supplement-3.pdf]
